# Supplementary material for: A Genome-Wide Scan for MicroRNA-Related Genetic Variants Associated With Primary Open-Angle Glaucoma
Source: PubMed Central journal article supplement (PMC6110129; doi:10.1167/iovs.17-22410), 2017-10

## Supplementary data

**Table S1.** List of the primers for the cloning of precursor miR-4707

**Table S2.** Baseline characteristics of the Rotterdam Study for interaction analysis

**Table S3.** List of the primers for the cloning of 3'UTR sequence of *CARD10*

**Table S4.** List of databases and web tools used for functional annotation of miRNA-binding site SNPs associated with POAG endophenotypes

**Table S5.** MiRNA genetic variants nominally associated with POAG endophenotypes

**Table S6.** miR-612 and miR-4707-3p putative target genes associated with VCDR and cup area

**Table S7.** Expression of the putative miR-612 and miR-4707-3p target genes associated with VCDR and cup area across different eye tissues

**Table S8.** The miRNA-target gene interaction analysis using the Rotterdam Study data

**Table S9.** Forty-seven miRNA-binding site variants within the 3'UTRs of 21 genes associated with POAG endophenotypes

**Table S10.** Functional characteristics of 47 miRNA-binding site variants associated with POAG endophenotypes

**Table S11.** Expression of genes hosting the 47 miRNA-binding site variants associated with POAG endophenotypes across eye tissues

**Table S12.** Prioritization of 47 miRNA-binding site variants associated with POAG endophenotypes

**Figure S1.** The predicted hairpin structure of pre-miR-612 and pre-miR-4707 and the position of two identified variants associated with VCDR and cup area

**Figure S2.** Manhattan plots showing the association of 72,052 miRNA-binding site variants with POAG endophenotypes

**Figure S3.** Regional plots showing the association of ten highlighted miRNA-binding site variants with POAG endophenotypes

**Table S1. List of the primers for the cloning of precursor miR-4707**

| Oligo name     | Sequence (5'-3')                                                                                                       |
|----------------|------------------------------------------------------------------------------------------------------------------------|
| miR-4707_WT_F  | 5' <b>TCGAG</b> GGTTCCGGAGCCCCGGCGCGGGCGGGTTCTGGGGTGTAGACGCTGCTGGCCAGCCC <u>G</u> CCCCAGCCGAGGTTCTCGGCACCC <b>G</b> 3' |
| miR-4707_WT_R  | 5' <b>AATTC</b> GGTGCCGAGAACCTCGGCTGGGG <u>C</u> GGGCTGGCCAGCAGCGTCTACACCCCAGAACCCGCCCGCGCCGGGGCTCCGGAACCC <b>C</b> 3' |
| miR-4707_Mut_F | 5' <b>TCGAG</b> GGTTCCGGAGCCCCGGCGCGGGCGGGTTCTGGGGTGTAGACGCTGCTGGCCAGCCC <u>U</u> CCCCAGCCGAGGTTCTCGGCACCC <b>G</b> 3' |
| miR-4707_Mut_R | 5' <b>AATTC</b> GGTGCCGAGAACCTCGGCTGGGG <u>A</u> GGGCTGGCCAGCAGCGTCTACACCCCAGAACCCGCCCGCGCCGGGGCTCCGGAACCC <b>C</b> 3' |

WT, Wild type pre-miRNA sequence containing allele G at the rs2273626 SNP site; Mut, Mutant pre-miRNA containing allele A at the rs2273626 SNP site; F, Forward; R, Reverse. The restriction enzymes XhoI and EcoRI (with sticky end) are shown in red and the position of SNP is underlined in the pre-miRNA sequence.

**Table S2. Baseline characteristics of the Rotterdam Study for interaction analysis**

|                                      | <b>Total</b>   |
|--------------------------------------|----------------|
| Number of participants               | 10,404         |
| Age (years)                          | 64.4 (9.1)     |
| Sex (male)                           | 4441 (42.7 %)  |
| Body mass index (kg/m <sup>2</sup> ) | 27.28 (9.14)   |
| Systolic blood pressure (mmHg)       | 140.83 (25.66) |
| Diastolic blood pressure (mmHg)      | 75.76 (18.46)  |

Data are mean (SD) or n (%)

**Table S3. List of the primers for the cloning of 3'UTR of *CARD10* gene**

| Oligo name | Sequence (5'-3')                                                                                                        |
|------------|-------------------------------------------------------------------------------------------------------------------------|
| CARD10_F   | 5' <b>CTAG</b> ATGTAAATGTCACGCCCCACCCCTGTTTCATGTGGGCACTAACAC<br>GTGTGCGTTCCT <u>GGCGGGCA</u> CACTCAGGAC <b>GGGCC</b> 3' |
| CARD10_R   | 5' <b>C</b> GTCCTGAGTGTGCCCGCCAGGAACGCACACGTGTTAGTGCCACATGA<br>AACAGGGGTGGGGCGTGACATTTACAT <b>T</b> 3'                  |

F, Forward; R, Reverse. The restriction enzymes XbaI and ApaI (sticky end) are shown in red and the binding site of miR-4707-3p within the 3'UTR of *CARD10* is underlined.

**Table S4. List of databases and web tools used for functional annotation of miRNA-binding site SNPs associated with POAG endophenotypes**

| <b>Name</b>           | <b>Main feature</b>                                                                     | <b>URL</b>                                                                                                                            |
|-----------------------|-----------------------------------------------------------------------------------------|---------------------------------------------------------------------------------------------------------------------------------------|
| <b>miRNASNP v2</b>    | SNPs in miRNA-related sequences                                                         | <a href="http://bioinfo.life.hust.edu.cn/miRNASNP2/index.php">http://bioinfo.life.hust.edu.cn/miRNASNP2/index.php</a>                 |
| <b>PolymiRTS 3.0</b>  | SNPs in miRNA binding sites                                                             | <a href="http://compbio.uthsc.edu/miRSNP">http://compbio.uthsc.edu/miRSNP</a>                                                         |
| <b>Vienna RNA</b>     | Prediction of SNP effect on miRNA secondary structure                                   | <a href="http://rna.tbi.univie.ac.at">http://rna.tbi.univie.ac.at</a>                                                                 |
| <b>TargetScan 7.0</b> | miRNA target prediction                                                                 | <a href="http://www.targetscan.org">http://www.targetscan.org</a>                                                                     |
| <b>miRDB</b>          | miRNA target prediction                                                                 | <a href="http://mirdb.org/">http://mirdb.org/</a>                                                                                     |
| <b>IPA</b>            | A comprehensive software on biological and pathway analysis                             | <a href="http://www.ingenuity.com/products/ipa">http://www.ingenuity.com/products/ipa</a>                                             |
| <b>OTDB</b>           | Gene expression data across different human eye tissues from the Ocular Tissue Database | <a href="https://genome.uiowa.edu/otdb/">https://genome.uiowa.edu/otdb/</a>                                                           |
| <b>HMDD</b>           | The human miRNA expression database                                                     | <a href="http://bioinfo.life.hust.edu.cn/smallRNA/index.php">http://bioinfo.life.hust.edu.cn/smallRNA/index.php</a>                   |
| <b>SNAP</b>           | Proxy SNPs based on linkage disequilibrium and physical distance                        | <a href="https://www.broadinstitute.org/mpg/snap/ldsearch.php">https://www.broadinstitute.org/mpg/snap/ldsearch.php</a>               |
| <b>HaploReg v4.1</b>  | For exploring annotations of variants on haplotype blocks                               | <a href="http://www.broadinstitute.org/mammals/haploreg/haploreg.php">http://www.broadinstitute.org/mammals/haploreg/haploreg.php</a> |
| <b>Genenetwork</b>    | Whole blood eQTL data                                                                   | <a href="http://www.genenetwork.org/webqtl/main.py">http://www.genenetwork.org/webqtl/main.py</a>                                     |
| <b>GTEEx</b>          | eQTL data in other tissue                                                               | <a href="http://www.gtexportal.org/home">http://www.gtexportal.org/home</a>                                                           |
| <b>miRBase</b>        | miRNA information                                                                       | <a href="http://www.mirbase.org">http://www.mirbase.org</a>                                                                           |
| <b>GeneCards</b>      | A database of human genes                                                               | <a href="http://www.genecards.org/">http://www.genecards.org/</a>                                                                     |
| <b>LocusZoom</b>      | Generating regional association plots                                                   | <a href="http://www.locuszoom.org/">http://www.locuszoom.org/</a>                                                                     |

**Table S5. MiRNA genetic variants nominally associated with POAG endophenotypes**

| <b>miRNA ID</b> | <b>Location<br/>in miR</b> | <b>SNP ID</b> | <b>A1</b> | <b>A2</b> | <b>Freq A1</b> | <b>Chr</b> | <b>Effect</b> | <b>P-value</b> | <b>Pheno</b> |
|-----------------|----------------------------|---------------|-----------|-----------|----------------|------------|---------------|----------------|--------------|
| miR-1178        | seed                       | rs7311975     | t         | c         | 0.9683         | 12         | -0.0285       | 0.01393        | DA           |
| miR-1178        | premiR                     | rs74614893    | a         | g         | 0.0296         | 12         | 0.0107        | 0.01327        | VCDR         |
| miR-1208        | premiR                     | rs2648841     | t         | g         | 0.2379         | 8          | 0.0033        | 0.03801        | VCDR         |
| miR-1208        | premiR                     | rs56863230    | c         | g         | 0.0644         | 8          | 0.3185        | 0.02324        | IOP          |
| miR-1258        | premiR                     | rs146754630   | t         | c         | 0.9715         | 2          | 0.0121        | 0.0349         | VCDR         |
| miR-1269b       | seed                       | rs7210937     | c         | g         | 0.2272         | 17         | 0.0066        | 0.04866        | CA           |
| miR-1269b       | seed                       | rs7210937     | c         | g         | 0.2452         | 17         | 0.0036        | 0.03398        | VCDR         |
| miR-1283-1      | premiR                     | rs57111412    | a         | g         | 0.8095         | 19         | 0.0103        | 0.009886       | CA           |
| miR-1343        | premiR                     | rs2986407     | t         | c         | 0.2074         | 11         | 0.0101        | 0.02674        | DA           |
| miR-199b        | premiR                     | rs146892675   | t         | c         | 0.013          | 9          | -0.0478       | 0.01127        | CA           |
| miR-300         | premiR                     | rs12894467    | t         | c         | 0.4661         | 14         | 0.0097        | 0.02933        | DA           |
| miR-3144        | mature                     | rs67106263    | a         | g         | 0.215          | 6          | -0.0063       | 0.02388        | CA           |
| miR-3144        | premiR                     | rs68035463    | a         | c         | 0.215          | 6          | -0.0063       | 0.02384        | CA           |
| miR-3152        | mature                     | rs13299349    | a         | g         | 0.292          | 9          | -0.0088       | 0.000193       | CA           |
| miR-3152        | mature                     | rs13299349    | a         | g         | 0.2912         | 9          | -0.0031       | 0.01156        | VCDR         |
| miR-3166        | premiR                     | rs35854553    | a         | t         | 0.1006         | 11         | -0.0869       | 0.04025        | IOP          |
| miR-320e        | premiR                     | rs10423365    | a         | g         | 0.4807         | 19         | 0.0056        | 0.00788        | CA           |
| miR-339         | mature                     | rs72631820    | t         | c         | 0.9883         | 7          | 0.1433        | 0.00315        | DA           |
| miR-339         | mature                     | rs72631820    | t         | c         | 0.9886         | 7          | -0.6106       | 0.02465        | IOP          |
| miR-3609        | premiR                     | rs149626867   | a         | t         | 0.9899         | 7          | -0.1531       | 0.04763        | CA           |
| miR-3612        | premiR                     | rs1683709     | a         | g         | 0.291          | 12         | -0.0088       | 0.04418        | DA           |
| miR-3659        | premiR                     | rs553122      | t         | c         | 0.0271         | 1          | -0.138        | 0.005187       | DA           |
| miR-3683        | premiR                     | rs6943868     | a         | t         | 0.0413         | 7          | 0.0248        | 0.03751        | DA           |
| miR-3686        | premiR                     | rs6997249     | a         | g         | 0.2902         | 8          | 0.0571        | 0.03669        | IOP          |
| miR-3909        | premiR                     | rs9607265     | a         | g         | 0.0345         | 22         | -0.0677       | 0.03072        | DA           |
| miR-3928        | premiR                     | rs5997893     | a         | g         | 0.3983         | 22         | 0.0024        | 0.03375        | VCDR         |
| miR-3936        | premiR                     | rs367805      | t         | c         | 0.3522         | 5          | 0.0099        | 0.01168        | DA           |
| miR-411         | premiR                     | rs111906529   | t         | c         | 0.9867         | 14         | -0.0231       | 0.005906       | VCDR         |
| miR-4268        | premiR                     | rs4674470     | t         | c         | 0.7696         | 2          | 0.0091        | 0.04594        | DA           |
| miR-4274        | premiR                     | rs12512664    | a         | g         | 0.6065         | 4          | -0.0126       | 0.004623       | DA           |
| miR-4472-1      | seed                       | rs28655823    | c         | g         | 0.1145         | 8          | -0.0053       | 0.006561       | VCDR         |
| miR-4480        | premiR                     | rs7912031     | t         | g         | 0.9381         | 10         | -0.0263       | 0.03441        | CA           |
| miR-4480        | premiR                     | rs7912031     | t         | g         | 0.9277         | 10         | 0.266         | 0.04299        | IOP          |
| miR-4482        | premiR                     | rs641071      | t         | g         | 0.3494         | 10         | -0.058        | 0.01807        | IOP          |
| miR-4513        | seed                       | rs2168518     | a         | g         | 0.599          | 15         | 0.0663        | 0.008575       | IOP          |
| miR-4532        | seed                       | rs60432575    | a         | g         | 0.0532         | 20         | -0.0384       | 0.03172        | DA           |
| miR-4532        | seed                       | rs60432575    | a         | g         | 0.0593         | 20         | -0.0109       | 0.03875        | VCDR         |
| miR-4634        | premiR                     | rs7709117     | a         | g         | 0.6109         | 5          | -0.0025       | 0.04972        | VCDR         |
| miR-4655        | mature                     | rs78996026    | t         | c         | 0.0337         | 7          | 0.8643        | 0.03424        | IOP          |
| miR-4707        | seed                       | rs2273626     | a         | c         | 0.5674         | 14         | -0.0083       | 9.93E-05       | CA           |
| miR-4707        | seed                       | rs2273626     | a         | c         | 0.5817         | 14         | -0.0046       | 9.45E-05       | VCDR         |

|             |        |             |   |   |        |    |         |          |      |
|-------------|--------|-------------|---|---|--------|----|---------|----------|------|
| miR-4743    | premiR | rs7235219   | a | g | 0.984  | 18 | -0.0262 | 0.04093  | CA   |
| miR-4743    | premiR | rs7235219   | a | g | 0.9873 | 18 | -0.0204 | 0.002629 | VCDR |
| miR-4749    | mature | rs147943327 | t | c | 0.012  | 19 | -0.261  | 0.04944  | DA   |
| miR-4781    | seed   | rs74085143  | a | g | 0.0359 | 1  | 0.0132  | 0.04877  | CA   |
| miR-4781    | seed   | rs74085143  | a | g | 0.0365 | 1  | 0.0312  | 0.007822 | DA   |
| miR-4791    | premiR | rs77021670  | a | g | 0.9894 | 3  | -1.2754 | 0.01588  | IOP  |
| miR-4792    | premiR | rs11714172  | t | g | 0.5881 | 3  | 0.0537  | 0.0304   | IOP  |
| miR-492     | premiR | rs2289030   | c | g | 0.1246 | 12 | 0.1195  | 0.004177 | IOP  |
| miR-499b    | mature | rs3746444   | a | g | 0.8069 | 20 | 0.0061  | 0.02291  | CA   |
| miR-499b    | mature | rs3746444   | a | g | 0.8056 | 20 | -0.0101 | 0.02867  | DA   |
| miR-499b    | mature | rs3746444   | a | g | 0.8041 | 20 | -0.0751 | 0.008883 | IOP  |
| miR-520f    | premiR | rs75598818  | a | g | 0.0498 | 19 | -0.0237 | 0.009902 | CA   |
| miR-548ae-2 | premiR | rs10461441  | a | g | 0.8964 | 5  | -0.0138 | 0.04161  | DA   |
| miR-548al   | seed   | rs515924    | a | g | 0.8083 | 11 | -0.0082 | 0.002708 | CA   |
| miR-548al   | seed   | rs515924    | a | g | 0.8099 | 11 | 0.0857  | 0.004542 | IOP  |
| miR-548al   | seed   | rs515924    | a | g | 0.8063 | 11 | -0.0031 | 0.02442  | VCDR |
| miR-548ap   | mature | rs4414449   | a | g | 0.6176 | 15 | 0.0081  | 0.03079  | DA   |
| miR-548ap   | premiR | rs4577031   | a | t | 0.3825 | 15 | -0.0082 | 0.02995  | DA   |
| miR-548h-4  | premiR | rs184537764 | a | g | 0.9696 | 8  | 0.0171  | 0.02706  | CA   |
| miR-548h-4  | premiR | rs184537764 | a | g | 0.9715 | 8  | 0.0087  | 0.03774  | VCDR |
| miR-550a-3  | premiR | rs2696977   | t | c | 0.9825 | 7  | -0.0297 | 0.04466  | VCDR |
| miR-550a-3  | premiR | rs850108    | a | g | 0.763  | 7  | 0.0045  | 0.02953  | VCDR |
| miR-564     | premiR | rs2292181   | c | g | 0.0549 | 3  | 0.0116  | 0.01352  | CA   |
| miR-5680    | premiR | rs487571    | t | c | 0.384  | 8  | 0.0043  | 0.04257  | CA   |
| miR-5682    | premiR | rs9877402   | a | g | 0.9468 | 3  | 0.1559  | 0.005032 | IOP  |
| miR-5689    | mature | rs9295535   | t | c | 0.7457 | 6  | -0.007  | 0.005395 | CA   |
| miR-5689    | mature | rs9295535   | t | c | 0.7341 | 6  | -0.0038 | 0.002771 | VCDR |
| miR-5700    | mature | rs12314280  | t | c | 0.8986 | 12 | 0.0816  | 0.03086  | IOP  |
| miR-596     | mature | rs61388742  | t | c | 0.8886 | 8  | 0.0112  | 0.01198  | CA   |
| miR-597     | premiR | rs79397096  | a | g | 0.0125 | 8  | 0.0827  | 0.02142  | DA   |
| miR-612     | premiR | rs12803915  | a | g | 0.2014 | 11 | -0.0136 | 1.21E-06 | CA   |
| miR-612     | premiR | rs12803915  | a | g | 0.1978 | 11 | -0.0087 | 4.63E-09 | VCDR |
| miR-6130    | premiR | rs76118570  | a | t | 0.9879 | 21 | -0.2875 | 0.000543 | DA   |
| miR-656     | premiR | rs58834075  | t | c | 0.0264 | 14 | -0.038  | 0.01921  | DA   |
| miR-656     | premiR | rs58834075  | t | c | 0.0277 | 14 | -0.0144 | 0.002196 | VCDR |
| miR-6719    | premiR | rs182936228 | a | g | 0.0519 | 19 | 0.0123  | 0.04389  | VCDR |
| miR-6729-5p | Mature | rs75036690  | a | g | 0.0494 | 1  | -0.0427 | 0.04069  | DA   |
| miR-7854-3p | Mature | rs2925980   | a | g | 0.6452 | 16 | 0.0085  | 0.0285   | DA   |
| miR-941-3   | premiR | rs7360929   | t | c | 0.9589 | 20 | 0.0138  | 0.02685  | VCDR |

Shown are 63 genetic variants located in 59 unique miRNAs that are nominally ( $p < 0.05$ ) associated with POAG endophenotypes in the publicly available IGGC GWAS data.

**Table S6. The putative miR-612 and miR-4707-3p target genes associated with VCDR and cup area**

| miRNA ID    | Phenotype | All target genes<br>(number of SNPs) | VCDR-cup area-<br>associated putative<br>targets | Top SNP    | GWAS<br>p-value |
|-------------|-----------|--------------------------------------|--------------------------------------------------|------------|-----------------|
| miR-612     | VCDR      | 717<br>(118,327)                     | <i>USH2A</i>                                     | rs17025860 | 1.06E-120       |
|             |           |                                      | <i>FAM101A</i>                                   | rs11057482 | 4.30E-09        |
|             |           |                                      | <i>JRK</i>                                       | rs2978978  | 1.10E-08        |
|             |           |                                      | <i>SIX4</i>                                      | rs17834412 | 6.63E-08        |
| miR-612     | Cup area  | 717<br>(118,197)                     | <i>SIX4</i>                                      | rs17834412 | 4.0E-17         |
|             |           |                                      | <i>FAM101A</i>                                   | rs2001506  | 7.01E-13        |
| miR-4707-3p | VCDR      | 1159<br>(131,887)                    | <i>MYPN</i>                                      | rs10733840 | 4.43E-31        |
|             |           |                                      | <i>CARD10</i>                                    | rs6000755  | 3.52E-12        |
|             |           |                                      | <b><i>LTBP3</i></b>                              | rs12270054 | 5.69E-09        |
|             |           |                                      | <i>HIF0</i>                                      | rs5756825  | 1.54E-08        |
|             |           |                                      | <b><i>FLNB</i></b>                               | rs6764184  | 1.89E-08        |
|             |           |                                      | <i>SLC25A16</i>                                  | rs7906309  | 2.57E-08        |
| miR-4707-3p | Cup area  | 1159<br>(131,758)                    | <b><i>FLNB</i></b>                               | rs6764184  | 1.30E-10        |
|             |           |                                      | <i>MYPN</i>                                      | rs10733840 | 2.57E-09        |
|             |           |                                      | <i>PFAS</i>                                      | rs4791641  | 3.46E-07        |

Shown are putative target genes of miR-612 and miR-4707-3p associated with VCDR and cup area (using the publicly available GWAS data of POAG endophenotypes). TargetScan v7.0 (total context++ score > 0.01) and miRDB databases were used to extract the predicted target genes of the miRNAs. The Bonferroni correction was used (based on the number of SNPs in the studied target genes of each miRNA) to set the significance level, which is p-value < 4.2E-07 for miR-612 target genes and p-value < 3.8E-07 for miR-4707 target genes. The SNPs shown in the table are top SNPs in the mentioned target genes associated with VCDR and cup area. Bold target genes have been shown previously to be differentially expressed in the eye tissues (trabecular meshwork, aqueous humor or optic nerve) in the previous gene expression profiling studies of glaucoma patients.



**Table S7. Expression of the putative miR-612 and miR-4707-3p target genes associated with VCDR and cup area across different eye tissues**

| Gene            | Probe ID | Choroid RPE | Ciliary Body | Cornea | Optic Nerve | Retina | Sclera | Trabecular Meshwork |
|-----------------|----------|-------------|--------------|--------|-------------|--------|--------|---------------------|
| <i>USH2A</i>    | 2455699  | 22.6        | 21.3         | 15.9   | 20.1        | 237.9  | 19.9   | 16.8                |
| <i>FAM101A</i>  | 3436329  | 32.8        | 37.7         | 28.5   | 30.6        | 28.9   | 39.7   | 29.5                |
| <i>JRK</i>      | 3157060  | 44.5        | 40.7         | 52.8   | 50.4        | 35.6   | 50.4   | 43.7                |
| <i>SIX4</i>     | 3567391  | 83.9        | 81.3         | 118.4  | 121.2       | 86.5   | 110.9  | 86.0                |
| <i>MYPN</i>     | 3249641  | 22.2        | 20.0         | 21.1   | 18.2        | 22.3   | 19.3   | 16.7                |
| <i>CARD10</i>   | 3960133  | 60.0        | 60.3         | 68.6   | 67.0        | 70.0   | 83.8   | 66.6                |
| <i>LTBP3</i>    | 3377669  | 69.9        | 60.8         | 75.0   | 76.4        | 60.1   | 88.1   | 73.9                |
| <i>HIF0</i>     | 3945006  | 118.3       | 103.2        | 85.5   | 84.9        | 88.2   | 125.9  | 171.0               |
| <i>FLNB</i>     | 2625907  | 68.3        | 67.8         | 74.5   | 87.1        | 36.8   | 100.7  | 123.5               |
| <i>PFAS</i>     | 3709540  | 34.1        | 35.1         | 35.1   | 32.5        | 40.2   | 39.8   | 30.3                |
| <i>SLC25A16</i> | 3292735  | 60.8        | 38.8         | 59.1   | 48.7        | 70.4   | 53.4   | 75.5                |
| <i>FRMD8</i>    | 4010913  | 28.8        | 31.4         | 62.8   | 72.1        | 72.8   | 36.4   | 45.4                |

Shown are expression of a number of miR-612 and miR-4707-3p predicted target genes, which found to be significantly associated with VCDR and cup area, on eye tissues using the online Ocular Tissue Database. The gene expression is indicated as Affymetrix Probe Logarithmic Intensity Error (PLIER) number. The PLIER number were calculated by GC-background correction, PLIER normalization, log transformation and z-score calculation.

**Table S8. The miRNA-target gene interaction analysis using the Rotterdam Study data**

| miRNA    | SNP ID     | Target gene          | Top SNP          | Cup area<br>( <i>p</i> -value) | VCDR<br>( <i>p</i> -value) |
|----------|------------|----------------------|------------------|--------------------------------|----------------------------|
| miR-612  | rs12803915 | <i>SIX4</i>          | rs17834412       | 0.12                           | 0.19                       |
|          |            | <i>USH2A</i>         | rs17025860       | -                              | -                          |
|          |            | <i>FAM101A</i>       | rs11057482       | -                              | -                          |
|          |            | <i>JRK</i>           | rs2978978        | -                              | -                          |
| miR-4707 | rs2273626  | <i>MYPN</i>          | rs10733840       | 0.97                           | 0.38                       |
|          |            | <b><i>CARD10</i></b> | <b>rs6000755</b> | <b>0.028</b>                   | 0.06                       |
|          |            | <i>LTBP3</i>         | rs4244811        | 0.9                            | 0.95                       |
|          |            | <i>H1FO</i>          | rs5756825        | 0.92                           | 0.89                       |
|          |            | <i>FRMD8</i>         | rs1626021        | 0.82                           | 0.91                       |
|          |            | <i>FLNB</i>          | rs6764184        | -                              | -                          |
|          |            | <i>SLC25A16</i>      | rs7906309        | -                              | -                          |
|          |            | <i>PFAS</i>          | rs4791641        | -                              | -                          |

This table shows the interaction analysis between two identified SNPs in miR-612 and miR-4707 with the top SNP in their target genes associated with glaucoma using the Rotterdam Study (n=10,404). VCDR, the mean of vertical cup to disc ratio which is between 0 and 1 (Mean= 0.44, SD= 0.18); Cup area is between 0 and 2 (Mean= 0.54, SD= 0.34). This analysis indicates a significant interaction between miR-4707 (rs2273626) and *CARD10* (rs6000755) in relation to cup area, shown in bold.

**Table S9. Forty-seven miRNA-binding site variants within the 3'UTRs of 21 genes associated with POAG endophenotypes**

| SNP ID     | Gene ID      | Chr. | Position  | Asso. pheno | MA effect | p-value GWAS | A1 | miRNA binding sites in presence of A1                                                                     | A2 | miRNA binding sites in presence of A2                                                 |
|------------|--------------|------|-----------|-------------|-----------|--------------|----|-----------------------------------------------------------------------------------------------------------|----|---------------------------------------------------------------------------------------|
| rs12125947 | <i>CDC7</i>  | 1    | 91990487  | DA          | C (-)     | 4.00E-08     | t  | miR-6768-3p                                                                                               | c  | miR-4729, miR-4778-3p<br>miR-5696, miR-579-3p<br>miR-664b-3p                          |
| rs6660601  | <i>TMCO1</i> | 1    | 165695855 | IOP         | C (+)     | 4.23E-11     | c  | miR-296-3p, miR-323b-5p<br>miR-410-5p, miR-494-5p<br>miR-511-5p                                           | t  | miR-3158-3p, miR-4446-3p<br>miR-4675, miR-4741<br>miR-5088-5p, miR-626<br>miR-6876-3p |
| rs7524755  | <i>TMCO1</i> | 1    | 165694897 | IOP         | T (-)     | 4.35E-11     | c  | miR-4454, miR-598-5p                                                                                      | t  | miR-4299, miR-4456<br>miR-548q, miR-7978                                              |
| rs1057001  | <i>TRIB2</i> | 2    | 12881778  | CA          | T (+)     | 1.13E-09     | t  | miR-545-3p, miR-583                                                                                       | a  | miR-3125, miR-3916<br>miR-4310, miR-6859-5p<br>miR-7157-5p, miR-877-5p                |
| rs7344     | <i>SRSF3</i> | 6    | 36570366  | CA          | C (+)     | 3.95E-07     | t  | hsa-let-7f-2-3p, miR-1185-1-3p<br>miR-1185-2-3p, miR-3120-3p                                              | c  | hsa-let-7e-3p, miR-4445-3p<br><b>miR-548al</b>                                        |
| rs10249656 | <i>CAV2</i>  | 7    | 116147537 | IOP         | T(+)      | 1.22E-10     | c  | miR-3187-3p, miR-4435<br>miR-4701-5p, miR-588<br><b>miR-4781-3p</b> , miR-548s                            | t  | miR-4662a-5p, miR-575<br>miR-4676-5p, miR-6858                                        |
| rs10278782 | <i>CAV2</i>  | 7    | 116147401 | IOP         | G (+)     | 1.54E-10     | a  | miR-216b-3p                                                                                               | g  | miR-1228-3p                                                                           |
| rs1052990  | <i>CAV2</i>  | 7    | 116148370 | IOP         | G (+)     | 1.90E-09     | g  | miR-224-5p, miR-377-3p                                                                                    | t  | -                                                                                     |
| rs10216533 | <i>PSCA</i>  | 8    | 143763690 | VCDR        | A (-)     | 2.82E-08     | a  | miR-1273h-3p, <b>miR-3166</b><br>miR-342-5p, miR-4664-5p<br>miR-4771, miR-6782-5p                         | g  | miR-6767-5p                                                                           |
| rs1045547  | <i>PSCA</i>  | 8    | 143763757 | VCDR        | G (+)     | 2.67E-08     | t  | miR-6826-5p                                                                                               | g  | <b>miR-597-5p</b> , miR-668-3p                                                        |
| rs1045574  | <i>PSCA</i>  | 8    | 143763958 | VCDR        | A (-)     | 2.50E-08     | g  | miR-4655-5p                                                                                               | a  | miR-296-5p, miR-6724-5p<br>miR-6773-5p                                                |
| rs1045605  | <i>PSCA</i>  | 8    | 143764101 | VCDR        | G (-)     | 2.66E-08     | c  | miR-2467-5p, miR-3188<br>miR-3975, miR-4649-3p<br>miR-4663, miR-485-5p<br>miR-6884-5p, miR-8077, miR-7160 | g  | miR-3155a, miR-3155b<br>miR-3934-3p, miR-484                                          |
| rs2976393  | <i>PSCA</i>  | 8    | 143763618 | VCDR        | G (-)     | 2.38E-08     | c  | miR-3650, miR-4455<br>miR-6818-5p, miR-6867-5p                                                            | g  | miR-4677-3p, miR-4679<br>miR-6753-3p, miR-7107-3p                                     |
| rs2976394  | <i>PSCA</i>  | 8    | 143763622 | VCDR        | T (-)     | 2.53E-08     | c  | miR-4455, miR-6781-5p<br>miR-6877-5p                                                                      | t  | miR-3934-5p, miR-4640-5p<br>miR-4726-5p, miR-6508-3p                                  |
| rs2976395  | <i>PSCA</i>  | 8    | 143763750 | VCDR        | A (-)     | 2.58E-08     | g  | miR-4537                                                                                                  | a  | miR-3160-3p                                                                           |

|            |                |    |           |             |       |          |   |                                                                                  |   |                                                      |
|------------|----------------|----|-----------|-------------|-------|----------|---|----------------------------------------------------------------------------------|---|------------------------------------------------------|
| rs2976396  | <i>PSCA</i>    | 8  | 143764001 | VCDR        | A (-) | 2.49E-08 | g | miR-4421, miR-5699-3p<br>miR-6748-3p                                             | a | miR-2355-3p, miR-3655<br>miR-4431, miR-676-3p        |
| rs8176751  | <i>ABO</i>     | 9  | 136131022 | IOP         | T (+) | 1.05E-08 | t | miR-3692-5p, miR-5580-5p<br>miR-6762, miR-6868-5p, miR-885-3p                    | c | -                                                    |
| rs1063192  | <i>CDKN2B</i>  | 9  | 22003367  | VCDR,<br>CA | G (-) | 5.31E-33 | a | miR-382-5p                                                                       | g | miR-3074-3p, miR-323b-5p<br>miR-410-5p<br>miR-494-5p |
| rs3217992  | <i>CDKN2B</i>  | 9  | 22003223  | CA,<br>VCDR | T (+) | 4.07E-18 | c | miR-138-2-3p, miR-205-3p                                                         | t | miR-374c-5p, miR-655-3p                              |
| rs1162756  | <i>HNRNPH3</i> | 10 | 70102936  | DA          | T (-) | 5.77E-08 | a | miR-489-3p                                                                       | t | -                                                    |
| rs3199937  | <i>HNRNPH3</i> | 10 | 70102749  | DA,<br>VCDR | A (-) | 1.35E-24 | a | miR-2115-3p, miR-361-5p                                                          | c | miR-383-5p, miR-6510-5p                              |
| rs2278675  | <i>MYPN</i>    | 10 | 69971652  | DA          | G (+) | 2.52E-15 | c | miR-1271-5p<br>miR-636, miR-96-5p                                                | g | -                                                    |
| rs876489   | <i>MYPN</i>    | 10 | 69970895  | DA          | C (+) | 8.41E-09 | c | miR-4761-5p, miR-624-3p                                                          | g | miR-133a-5p, miR-320e<br>miR-4490                    |
| rs881975   | <i>MYPN</i>    | 10 | 69971585  | DA          | A (+) | 1.20E-08 | a | <b>miR-339-5p</b> , hsa-let-7a-2-3p,<br>hsa-let-7g-3p, miR-486-5p<br>miR-6856-3p | g | miR-6752-3p                                          |
| rs881976   | <i>MYPN</i>    | 10 | 69971567  | DA          | T (+) | 2.67E-15 | c | miR-5008-3p, miR-548g-3p<br>miR-6737-3p, miR-7157-3p                             | t | miR-4728-3p                                          |
| rs1807347  | <i>PBLD</i>    | 10 | 68283964  | DA,<br>VCDR | A (-) | 3.13E-84 | a | miR-133a-5p, miR-4774-5p                                                         | g | miR-138-5p, miR-7978                                 |
| rs2305083  | <i>PBLD</i>    | 10 | 70044937  | DA,<br>VCDR | A (-) | 1.29E-83 | a | miR-1252-5p, miR-1265                                                            | c | miR-4493, miR-4687-3p<br>miR-605-3p, miR-6126        |
| rs731063   | <i>PBLD</i>    | 10 | 70043190  | DA,<br>VCDR | T (-) | 4.14E-84 | t | miR-3143, miR-543                                                                | c | miR-141-3p, miR-200a-3p                              |
| rs10998098 | <i>RUFY2</i>   | 10 | 68378024  | DA,<br>VCDR | A (-) | 8.54E-20 | g | miR-651-3p                                                                       | a | miR-3613-3p                                          |
| rs1177364  | <i>RUFY2</i>   | 10 | 70104799  | DA          | A (-) | 1.18E-07 | a | -                                                                                | g | miR-32-3p, miR-3591-5p<br>miR-3606-5p, miR-921       |
| rs17297439 | <i>RUFY2</i>   | 10 | 70103461  | DA,<br>VCDR | A (-) | 4.26E-25 | a | miR-4719                                                                         | g | -                                                    |
| rs2281697  | <i>RUFY2</i>   | 10 | 70103958  | DA,<br>VCDR | G (-) | 4.64E-25 | a | miR-6074                                                                         | g | <b>miR-548ap/h</b> , miR-559<br>miR-8054             |
| rs2281698  | <i>RUFY2</i>   | 10 | 70104320  | DA,<br>VCDR | C (-) | 6.82E-25 | t | miR-4474-3p                                                                      | c | miR-132-5p                                           |
| rs3781567  | <i>RUFY2</i>   | 10 | 70105178  | DA,<br>VCDR | T (-) | 9.99E-25 | t | miR-219b-3p, miR-3123<br>miR-6511b-5p, miR-6811-5p                               | c | miR-1205, miR-146a-5p<br>miR-146b-5p, miR-3925-5p    |

|            |                 |    |          |             |       |          |   |                                                                                                                                  |   |                                                                                                                                                                            |
|------------|-----------------|----|----------|-------------|-------|----------|---|----------------------------------------------------------------------------------------------------------------------------------|---|----------------------------------------------------------------------------------------------------------------------------------------------------------------------------|
| rs3781568  | <i>RUFY2</i>    | 10 | 70105286 | DA,<br>VCDR | A (-) | 1.66E-24 | a | miR-1298-3p, miR-3126-3p                                                                                                         | c | miR-4418, miR-509-3-5p<br>miR-509-5p, miR-7153-5p<br>miR-3191-5p<br>miR-326, miR-330-5p<br>miR-518c-5p, miR-6764-3p<br>miR-6817-3p, miR-6824-3p<br>miR-6828-3p, miR-767-3p |
| rs1136645  | <i>SLC25A16</i> | 10 | 70242513 | DA,<br>VCDR | C (-) | 5.37E-19 | c | miR-3622b-5p, miR-4720-5p<br>miR-4799-3p, miR-5588-5p                                                                            | t | <b>miR-564</b>                                                                                                                                                             |
| rs4350264  | <i>SLC25A16</i> | 10 | 70242946 | DA          | A (-) | 1.35E-15 | g | miR-518                                                                                                                          | a | miR-4422, miR-6835-3p                                                                                                                                                      |
| rs1044269  | <i>CELF1</i>    | 11 | 47487740 | IOP         | G (+) | 2.32E-07 | a | miR-4721                                                                                                                         | g | miR-1273c                                                                                                                                                                  |
| rs595139   | <i>FOLH1</i>    | 11 | 49168300 | IOP         | A (+) | 1.29E-08 | g | miR-186-5p, miR-3133<br>miR-4509, miR-4744                                                                                       | a | miR-4668-3p, miR-548c-3p                                                                                                                                                   |
| rs948577   | <i>MAP3K11</i>  | 11 | 65365318 | VCDR        | C (-) | 2.47E-07 | c | miR-124-3p, miR-1295b<br>miR-1912, miR-500b-3p, miR-506-3p                                                                       | t | miR-3910, miR-520a-5p<br>miR-525-5p                                                                                                                                        |
| rs12421026 | <i>PAX6</i>     | 11 | 31809322 | DA          | T (+) | 5.53E-08 | t | miR-1287-5p, miR-3135b<br>miR-6081                                                                                               | c | miR-1203                                                                                                                                                                   |
| rs1506     | <i>PAX6</i>     | 11 | 31810298 | DA          | T (-) | 6.34E-09 | a | miR-1537-5p, miR-3620-3p<br>miR-370-3p, miR-4718<br>miR-4999-5p, miR-6893-3p                                                     | t | miR-500b-3p                                                                                                                                                                |
| rs3026401  | <i>PAX6</i>     | 11 | 31807524 | DA          | C (-) | 4.21E-09 | t | miR-5681b, miR-5696<br>miR-579-3p, miR-664a-3p<br>miR-664b-3p                                                                    | c | miR-5579-5p                                                                                                                                                                |
| rs1043207  | <i>RBM23</i>    | 14 | 23369994 | VCDR        | A (+) | 6.53E-07 | g | miR-3924                                                                                                                         | a | miR-190a-3p, miR-5011-5p<br>miR-6083                                                                                                                                       |
| rs1050285  | <i>AAGAB</i>    | 15 | 67494494 | IOP         | C (-) | 2.89E-07 | t | miR-329-5p, miR-4659a-3p<br>miR-4659b-3p, miR-6875-3p                                                                            | c | miR-3667-3p, miR-6734-3p<br>miR-6868-3p                                                                                                                                    |
| rs1132554  | <i>PFAS</i>     | 17 | 8173767  | CA          | T (-) | 5.53E-07 | c | miR-149-3p, miR-3184-5p<br>miR-423-5p, miR-4489<br>miR-4728-5p, miR-6085<br>miR-6785-5p, miR-6813-5p<br>miR-6825-5p, miR-6883-5p | t | miR-3175, miR-3975<br>miR-6731-5p, miR-8085                                                                                                                                |
| rs3171656  | <i>TRIOBP</i>   | 22 | 38172213 | VCDR        | A (+) | 3.16E-07 | g | miR-3663-3p                                                                                                                      | a | miR-30a-3p, miR-30d-3p<br>miR-30e-3p, miR-5003-3p                                                                                                                          |

Shown are 47 glaucoma-associated variants that are predicted to affect miRNA-binding sites using PolymiRTS (v3.0). DA, disc area; CA, cup area; Chr, chromosome; MA, minor allele; A1, ancestral allele; A2, alternative allele. Bold miRNAs have been shown previously to be differentially expressed in the eye tissues (trabecular meshwork, aqueous humor or optic nerve) in the previous miRNA expression profiling studies of glaucoma patients.

**Table S10. Functional characteristics of 47 miRNA-binding site variants associated with POAG endophenotypes**

| SNP ID            | Host gene     | A1 | A2 | Chr. | Position  | MAF<br>(Europe) | Proxy SNPs<br>( $R^2 > 0.8$ ) | Non-syn.<br>Proxies | cis-eQTL<br>(tissue)                | Effect allele<br>in eQTL ( $\beta$ ) |
|-------------------|---------------|----|----|------|-----------|-----------------|-------------------------------|---------------------|-------------------------------------|--------------------------------------|
| <b>rs12125947</b> | <i>CDC7</i>   | t  | c  | 1    | 91990487  | 0.49            | 15                            | 0                   | Brain, Nerve, Blood, other tissues  | C (-)                                |
| <b>rs6660601</b>  | <i>TMCO1</i>  | c  | t  | 1    | 165695855 | 0.15            | 33                            | 0                   | Nerve, Blood, Artery, other tissues | C (-)                                |
| rs7524755         | <i>TMCO1</i>  | c  | t  | 1    | 165694897 | 0.15            | 33                            | 0                   | Nerve, Blood, Artery, other tissues | T (-)                                |
| <b>rs1057001</b>  | <i>TRIB2</i>  | t  | a  | 2    | 12881778  | 0.49            | 10                            | 0                   | Nerve, Whole blood                  | T (-)                                |
| <b>rs7344</b>     | <i>SRSF3</i>  | t  | c  | 6    | 36570366  | 0.25            | 64                            | 0                   | Nerve, Whole blood, Skin, Thyroid   | C (+)                                |
| <b>rs10249656</b> | <i>CAV2</i>   | c  | t  | 7    | 116147537 | 0.15            | 10                            | 1                   | Pancreases, Testis                  | T (-)                                |
| rs10278782        | <i>CAV2</i>   | a  | g  | 7    | 116147401 | 0.15            | 10                            | 1                   | Pancreases, Blood                   | G (-)                                |
| <b>rs1052990</b>  | <i>CAV2</i>   | g  | t  | 7    | 116148370 | 0.34            | 11                            | 0                   | Pancreases, Blood, Lung, Testis     | G (-)                                |
| <b>rs10216533</b> | <i>PSCA</i>   | a  | g  | 8    | 143763690 | 0.44            | 48                            | 0                   | Brain, Nerve, Blood, other tissues  | A (+)                                |
| rs1045547         | <i>PSCA</i>   | t  | g  | 8    | 143763757 | 0.44            | 48                            | 0                   | Brain, Nerve, Blood, other tissues  | G (+)                                |
| rs1045574         | <i>PSCA</i>   | g  | a  | 8    | 143763958 | 0.44            | 48                            | 0                   | Brain, Nerve, Blood, other tissues  | A (+)                                |
| rs1045605         | <i>PSCA</i>   | c  | g  | 8    | 143764101 | 0.44            | 48                            | 0                   | Brain, Nerve, Blood, other tissues  | G (+)                                |
| rs2976393         | <i>PSCA</i>   | c  | g  | 8    | 143763618 | 0.45            | 48                            | 0                   | Brain, Nerve, Blood, other tissues  | G (+)                                |
| rs2976394         | <i>PSCA</i>   | c  | t  | 8    | 143763622 | 0.44            | 48                            | 0                   | Brain, Nerve, Blood, other tissues  | T (+)                                |
| rs2976395         | <i>PSCA</i>   | g  | a  | 8    | 143763750 | 0.44            | 48                            | 0                   | Brain, Nerve, Blood, other tissues  | A (+)                                |
| rs2976396         | <i>PSCA</i>   | g  | a  | 8    | 143764001 | 0.44            | 48                            | 0                   | Brain, Nerve, Blood, other tissues  | A (+)                                |
| <b>rs8176751</b>  | <i>ABO</i>    | t  | c  | 9    | 136131022 | 0.11            | 7                             | 1                   | Nerve, Adipose, Heart, Lung, Skin   | T (+)                                |
| <b>rs1063192</b>  | <i>CDKN2B</i> | a  | g  | 9    | 22003367  | 0.43            | 29                            | 0                   | Temporal cortex                     | G (-)                                |
| <b>rs3217992</b>  | <i>CDKN2B</i> | c  | t  | 9    | 22003223  | 0.40            | 4                             | 0                   | Whole blood                         | T (+)                                |
| <b>rs2278675</b>  | <i>MYPN</i>   | c  | g  | 10   | 69971652  | 0.46            | 11                            | 0                   | Muscle skeletal                     | G (+)                                |
| rs881976          | <i>MYPN</i>   | c  | t  | 10   | 69971567  | 0.46            | 11                            | 0                   | Muscle skeletal                     | T (+)                                |
| <b>rs876489</b>   | <i>MYPN</i>   | c  | g  | 10   | 69970895  | 0.35            | 22                            | 0                   | -                                   | C (+)                                |
| rs881975          | <i>MYPN</i>   | a  | g  | 10   | 69971585  | 0.35            | 22                            | 0                   | -                                   | A (+)                                |

|                   |                 |   |   |    |          |      |    |   |                                      |       |
|-------------------|-----------------|---|---|----|----------|------|----|---|--------------------------------------|-------|
| <b>rs1807347</b>  | <i>PBLD</i>     | a | g | 10 | 68283964 | 0.20 | 30 | 1 | Brain, Nerve, Liver, other tissues   | A (+) |
| rs2305083         | <i>PBLD</i>     | a | c | 10 | 70044937 | 0.20 | 30 | 1 | Brain, Nerve, Liver, other tissues   | A (+) |
| rs731063          | <i>PBLD</i>     | t | c | 10 | 70043190 | 0.20 | 30 | 1 | Brain, Nerve, Liver, other tissues   | T (+) |
| <b>rs1162756</b>  | <i>HNRNPH3</i>  | a | t | 10 | 70102936 | 0.03 | 30 | 1 | -                                    | T (-) |
| rs1177364         | <i>RUFY2</i>    | a | g | 10 | 70104799 | 0.03 | 30 | 1 | -                                    | A (-) |
| <b>rs17297439</b> | <i>RUFY2</i>    | a | g | 10 | 70103461 | 0.11 | 81 | 0 | Brain, Nerve, Blood, other tissues   | A (+) |
| rs2281697         | <i>RUFY2</i>    | a | g | 10 | 70103958 | 0.11 | 81 | 0 | Brain, Nerve, Blood, other tissues   | G (+) |
| rs2281698         | <i>RUFY2</i>    | t | c | 10 | 70104320 | 0.11 | 81 | 0 | Brain, Nerve, Blood, other tissues   | C (+) |
| rs3781567         | <i>RUFY2</i>    | t | c | 10 | 70105178 | 0.12 | 81 | 0 | Brain, Nerve, Blood, other tissues   | T (+) |
| rs3781568         | <i>RUFY2</i>    | a | c | 10 | 70242946 | 0.12 | 81 | 0 | Brain, Nerve, Blood, other tissues   | A (+) |
| rs10998098        | <i>RUFY2</i>    | g | a | 10 | 68378024 | 0.11 | 81 | 0 | Brain, Nerve, Blood, other tissues   | A (+) |
| rs3199937         | <i>HNRNPH3</i>  | a | c | 10 | 70102749 | 0.11 | 81 | 0 | Brain, Nerve, Blood, other tissues   | A (-) |
| <b>rs1136645</b>  | <i>SLC25A16</i> | c | t | 10 | 70242513 | 0.13 | 26 | 0 | Brain, Nerve, Blood, other tissues   | C (-) |
| <b>rs4350264</b>  | <i>SLC25A16</i> | g | a | 10 | 70105286 | 0.11 | 60 | 0 | Brain, Nerve, Blood, other tissues   | A (-) |
| <b>rs1044269</b>  | <i>CELF1</i>    | a | g | 11 | 47487740 | 0.15 | 30 | 0 | Nerve, Muscle, Blood, other tissues  | G (+) |
| <b>rs595139</b>   | <i>FOLH1</i>    | g | a | 11 | 49168300 | 0.14 | 60 | 2 | Skin, Testis                         | A (+) |
| <b>rs948577</b>   | <i>MAP3K11</i>  | c | t | 11 | 65365318 | 0.27 | 20 | 0 | Artery, Adipose, Blood, Skin         | C (-) |
| <b>rs1506</b>     | <i>PAX6</i>     | a | t | 11 | 31810298 | 0.17 | 4  | 0 | -                                    | T (-) |
| rs3026401         | <i>PAX6</i>     | t | c | 11 | 31807524 | 0.19 | 4  | 0 | -                                    | C (-) |
| <b>rs12421026</b> | <i>PAX6</i>     | t | c | 11 | 31809322 | 0.49 | 3  | 0 | Lymphoblastoid                       | T (-) |
| <b>rs1043207</b>  | <i>RBM23</i>    | g | a | 14 | 23369994 | 0.26 | 1  | 0 | Brain, Nerve, Blood, other tissues   | A (-) |
| <b>rs1050285</b>  | <i>AAGAB</i>    | t | c | 15 | 67494494 | 0.48 | 74 | 0 | Adipose, Lung, Skin, Thyroid         | C (-) |
| <b>rs1132554</b>  | <i>PFAS</i>     | c | t | 17 | 8173767  | 0.45 | 5  | 0 | Nerve, Blood, Adipose, Colon         | T (-) |
| <b>rs3171656</b>  | <i>TRIOBP</i>   | g | a | 22 | 38172213 | 0.34 | 61 | 2 | Nerve, Blood, Adipose, other tissues | A (-) |

The high LD proxies and eQTL of 47 miRNA-binding site SNPs associated with POAG endophenotypes using HaploReg v4.1. In total, 723 intronic and 10 missense SNPs are in LD ( $R^2 > 0.8$ ) with the binding site SNPs. Bold are the most significant SNPs among the correlated SNPs in one gene.

**Table 11. Expression of genes hosting the 47 miRNA-binding site variants associated with POAG endophenotypes in eye tissues**

| <b>Gene ID</b>  | <b>Probe ID</b> | <b>Trabecular Meshwork</b> | <b>Optic Nerve</b> | <b>Choroid RPE</b> | <b>Ciliary Body</b> | <b>Cornea</b> | <b>Lens</b> | <b>Retina</b> | <b>Sclera</b> |
|-----------------|-----------------|----------------------------|--------------------|--------------------|---------------------|---------------|-------------|---------------|---------------|
| <i>AAGAB</i>    | 3630450         | 147.6                      | 37.1               | 50.1               | 48.7                | 82.2          | 76.4        | 48.7          | 39.1          |
| <i>ABO</i>      | 3228582         | 33.3                       | 25.7               | 36.3               | 20.2                | 25.6          | 30.9        | 23.3          | 33.6          |
| <i>CAV2</i>     | 3020273         | 39.8                       | 19.5               | 24.8               | 31.3                | 30.3          | 21          | 20.4          | 23.7          |
| <i>CDC7</i>     | 2346399         | 31.4                       | 13.3               | 19.4               | 31.1                | 26.3          | 11.0        | 42.1          | 14.1          |
| <i>CDKN2B</i>   | 3201488         | 21.4                       | 42.8               | 28.8               | 16.5                | 34.2          | 43.0        | 35.8          | 36.5          |
| <i>CELF1</i>    | 3372253         | 88.4                       | 60.2               | 44.1               | 36.6                | 72.2          | 548.2       | 61.1          | 43.2          |
| <i>FOLH1</i>    | 3372896         | 28.8                       | 164.6              | 53.1               | 47.9                | 24.0          | 37.2        | 22.6          | 32.2          |
| <i>HNRNPH3</i>  | 3249738         | 646.0                      | 699.6              | 736.9              | 619.8               | 568.4         | 983.0       | 704.1         | 523.7         |
| <i>MAP3K11</i>  | 3377752         | 34.5                       | 34.8               | 30.7               | 27.2                | 43.3          | 31.5        | 37.1          | 39.6          |
| <i>MYPN</i>     | 3249641         | 16.7                       | 18.2               | 22.2               | 20.0                | 21.1          | 26.1        | 22.3          | 19.3          |
| <i>PAX6</i>     | 3368054         | 26.9                       | 49.5               | 146.5              | 424.1               | 1207.9        | 583.4       | 299.4         | 22.4          |
| <i>PBLD</i>     | 3292590         | 60.5                       | 88.8               | 88.8               | 40.5                | 67.9          | 93.0        | 69.4          | 25.1          |
| <i>PFAS</i>     | 3709540         | 30.3                       | 32.5               | 34.1               | 35.0                | 35.1          | 35.8        | 40.2          | 39.8          |
| <i>PSCA</i>     | 3119200         | 28.7                       | 32.3               | 35.4               | 32.3                | 22.1          | 36.4        | 31.8          | 23.9          |
| <i>RBM23</i>    | 3556888         | 50.5                       | 39.4               | 46.2               | 42.0                | 52.4          | 40.8        | 56.3          | 36.9          |
| <i>RUFY2</i>    | 3292634         | 108.8                      | 166.0              | 109.8              | 90.1                | 92.3          | 139.2       | 118.5         | 74.9          |
| <i>SRSF3</i>    | 2905118         | 356.1                      | 206.2              | 558.1              | 462.2               | 271.3         | 257.9       | 224.6         | 178.9         |
| <i>SLC25A16</i> | 3292735         | 75.5                       | 48.7               | 60.9               | 38.8                | 59.0          | 78.5        | 70.4          | 53.4          |
| <i>TMCO1</i>    | 2442134         | 188.4                      | 143.4              | 205.4              | 138.5               | 224.6         | 149.5       | 145.4         | 119.1         |
| <i>TRIB2</i>    | 2470165         | 121.3                      | 94.7               | 150.1              | 80.6                | 31.3          | 41.4        | 227.3         | 93.9          |
| <i>TRIOBP</i>   | 3944922         | 30.8                       | 28.0               | 35.2               | 29.5                | 37.7          | 36.9        | 17.8          | 28.1          |

Expression of 21 genes hosting the 47 miRNA-binding sites associated with glaucoma endophenotypes across human eye tissues (using The Ocular Tissue Database). The gene expression is indicated as Affymetrix Probe Logarithmic Intensity Error (PLIER) number. The PLIER number were calculated by GC-background correction, PLIER normalization, log transformation and z-score calculation.



**Table S12. Prioritization of 47 miRNA-binding site variants associated with glaucoma endophenotypes**

| SNP ID     | Top in GWAS | eQTL | MA (effect) | Proxy SNPs (# non-syn) | Gene ID       | Gene exp in the eye | Gene asso with dis | MiRNA-binding site (disruption/creation) | miR exp in the eye | miR asso with dis | Score |
|------------|-------------|------|-------------|------------------------|---------------|---------------------|--------------------|------------------------------------------|--------------------|-------------------|-------|
| rs3217992  | ✓           | ✓    | T (+)       | 4 (0)                  | <i>CDKN2B</i> | ✓                   | ✓                  | miR-138-2-3p                             | ✓                  | ✓                 | 9     |
| rs1063192  | ✓           | ✓    | G (-)       | 29 (0)                 | <i>CDKN2B</i> | ✓                   | ✓                  | miR-323-5p                               | ✓                  | ✓                 | 8     |
| rs1052990  | ✓           | ✓✓   | G (-)       | 11 (0)                 | <i>CAV2</i>   | ✓                   | ✓                  | miR-224-5p                               | ✓                  | ✓                 | 8     |
| rs1050285  | ✓           | ✓    | C (-)       | 74 (0)                 | <i>AAGAB</i>  | ✓                   | ✓                  | miR-329-5p                               | ✓                  | -                 | 8     |
| rs10216533 | ✓           | ✓✓   | A (+)       | 48 (0)                 | <i>PSCA</i>   | ✓                   | ✓                  | miR-342-5p, miR-1273-3p                  | ✓                  | -                 | 8     |
| rs1132554  | ✓           | ✓    | T (-)       | 5 (0)                  | <i>PFAS</i>   | ✓                   | ✓                  | miR-149-3p, miR-423-5p                   | ✓                  | -                 | 8     |
| rs1057001  | ✓           | ✓✓   | T (-)       | 10 (0)                 | <i>TRIB2</i>  | ✓                   | ✓                  | miR-877-5p                               | ✓                  | -                 | 8     |
| rs1043207  | ✓           | ✓✓   | A (-)       | 1 (0)                  | <i>RBM23</i>  | ✓                   | ✓                  | miR-190a-3p                              | ✓                  | -                 | 8     |
| rs8176751  | ✓           | ✓✓   | T (+)       | 7 (1)                  | <i>ABO</i>    | ✓                   | ✓                  | miR-885-3p                               | ✓                  | -                 | 8     |
| rs7344     | ✓           | ✓✓   | C (+)       | 64 (0)                 | <i>SFRS3</i>  | ✓                   | ✓                  | <b>miR-548a1</b> , Let-7f-2-3p           | ✓                  | -                 | 8     |
| rs1045547  | ✓           | ✓✓   | G (+)       | 48 (0)                 | <i>PSCA</i>   | ✓                   | ✓                  | <b>miR-597-5p</b>                        | ✓                  | -                 | 8     |
| rs2281697  | -           | ✓✓   | G (+)       | 81 (0)                 | <i>RUFY2</i>  | ✓                   | ✓                  | <b>miR-548ap/h</b> , miR-559             | ✓                  | -                 | 7     |
| rs3781568  | -           | ✓✓   | A (+)       | 81 (0)                 | <i>RUFY2</i>  | ✓                   | ✓                  | miR-1298-3p                              | ✓                  | -                 | 7     |
| rs2281698  | -           | ✓✓   | C (+)       | 81 (0)                 | <i>RUFY2</i>  | ✓                   | ✓                  | miR-132-5p                               | ✓                  | -                 | 7     |
| rs10998098 | -           | ✓✓   | A (+)       | 81 (0)                 | <i>RUFY2</i>  | ✓                   | ✓                  | miR-3613-3p                              | ✓                  | -                 | 7     |
| rs3781567  | -           | ✓✓   | T (+)       | 81 (0)                 | <i>RUFY2</i>  | ✓                   | ✓                  | miR-219b-3p                              | ✓                  | -                 | 7     |
| rs10249656 | ✓           | ✓✓   | T (-)       | 10 (1)                 | <i>CAV2</i>   | ✓                   | ✓                  | <b>miR-4781-3p</b> , miR-575             | ✓                  | -                 | 7     |
| rs6660601  | ✓           | ✓✓   | C (-)       | 33 (0)                 | <i>TMCO1</i>  | ✓                   | ✓                  | miR-323-5p, miR-410-5p                   | ✓                  | -                 | 7     |
| rs1045605  | ✓           | ✓✓   | G (+)       | 48 (0)                 | <i>PSCA</i>   | ✓                   | ✓                  | miR-485-5p                               | ✓                  | -                 | 7     |
| rs2278675  | -           | ✓✓   | G (+)       | 11 (0)                 | <i>MYPN</i>   | ✓                   | ✓                  | miR-1271-5p, miR-96-5p                   | ✓                  | -                 | 6     |
| rs2976396  | ✓           | ✓✓   | A (+)       | 48 (0)                 | <i>PSCA</i>   | ✓                   | ✓                  | miR-676-3p                               | ✓                  | -                 | 6     |
| rs2305083  | ✓           | ✓✓   | A (+)       | 30 (1)                 | <i>PBLD</i>   | ✓                   | ✓                  | miR-1252-5p                              | -                  | -                 | 6     |
| rs881976   | -           | ✓✓   | T (+)       | 11 (0)                 | <i>MYPN</i>   | ✓                   | ✓                  | miR-548g-3p                              | ✓                  | -                 | 6     |
| rs1045574  | ✓           | ✓✓   | A (+)       | 48 (0)                 | <i>PSCA</i>   | ✓                   | ✓                  | miR-296-5p                               | ✓                  | -                 | 6     |
| rs10278782 | ✓           | ✓✓   | G (-)       | 10 (1)                 | <i>CAV2</i>   | ✓                   | ✓                  | miR-1228-3p                              | ✓                  | -                 | 6     |
| rs12125947 | -           | ✓✓   | C (-)       | 15 (0)                 | <i>CDC7</i>   | ✓                   | ✓                  | <b>miR-579-3p</b>                        | -                  | -                 | 6     |
| rs876489   | ✓           | -    | C (+)       | 22 (0)                 | <i>MYPN</i>   | ✓                   | ✓                  | <b>miR-320e</b> , miR-133a               | ✓                  | -                 | 6     |

|            |   |    |       |        |                 |   |   |                                 |   |   |   |
|------------|---|----|-------|--------|-----------------|---|---|---------------------------------|---|---|---|
| rs1044269  | - | ✓  | G (+) | 30 (0) | <i>CELF1</i>    | ✓ | ✓ | miR-1273c                       | - | - | 5 |
| rs3026401  | ✓ | -  | C (-) | 4 (0)  | <i>PAX6</i>     | ✓ | ✓ | miR-664a-3p                     | ✓ | - | 5 |
| rs1506     | ✓ | -  | T (-) | 4 (0)  | <i>PAX6</i>     | ✓ | ✓ | miR-370-3p                      | ✓ | - | 5 |
| rs2976393  | ✓ | ✓✓ | G (+) | 48 (0) | <i>PSCA</i>     | ✓ | ✓ | miR-4677-3p                     | - | - | 5 |
| rs948577   | - | ✓✓ | C (-) | 20 (0) | <i>MAP3K11</i>  | ✓ | ✓ | miR-520a, miR-525               | ✓ | - | 5 |
| rs7524755  | ✓ | ✓✓ | T (-) | 33 (0) | <i>TMCO1</i>    | ✓ | ✓ | miR-548q                        | ✓ | - | 5 |
| rs731063   | - | ✓✓ | T (+) | 30 (1) | <i>PBLD</i>     | ✓ | ✓ | miR-543                         | ✓ | - | 5 |
| rs595139   | - | ✓✓ | A (+) | 60 (2) | <i>FOLH1</i>    | ✓ | ✓ | miR-186-5p                      | ✓ | - | 5 |
| rs3171656  | - | ✓✓ | A (-) | 61 (2) | <i>TRIOBP</i>   | ✓ | ✓ | miR-30a-3p                      | ✓ | - | 5 |
| rs1807347  | - | ✓✓ | A (+) | 30 (1) | <i>PBLD</i>     | ✓ | ✓ | miR-133a-5p                     | ✓ | - | 5 |
| rs17297439 | - | ✓✓ | A (+) | 81 (0) | <i>RUFY2</i>    | ✓ | ✓ | miR-4719                        | - | - | 5 |
| rs12421026 | - | ✓✓ | T (-) | 3 (0)  | <i>PAX6</i>     | ✓ | ✓ | miR-3135b                       | - | - | 5 |
| rs1136645  | - | ✓  | C (-) | 26 (0) | <i>SLC25A16</i> | ✓ | ✓ | <b>miR-564</b>                  | - | - | 5 |
| rs881975   | - | -  | A (+) | 22 (0) | <i>MYPN</i>     | ✓ | ✓ | <b>miR-339-5p</b> , Let-7a-2-3p | ✓ | - | 5 |
| rs3199937  | - | -  | A (-) | 81 (0) | <i>HNRNPH3</i>  | ✓ | ✓ | miR-361-5p                      | ✓ | - | 4 |
| rs4350264  | ✓ | ✓  | A (-) | 60 (0) | <i>SLC25A16</i> | ✓ | ✓ | miR-4422                        | - | - | 4 |
| rs2976395  | ✓ | ✓✓ | A (+) | 48 (0) | <i>PSCA</i>     | ✓ | ✓ | miR-3160-3p                     | - | - | 4 |
| rs2976394  | ✓ | ✓✓ | T (+) | 48 (0) | <i>PSCA</i>     | ✓ | ✓ | miR-3934-5p                     | - | - | 4 |
| rs1177364  | - | -  | A (-) | 30 (1) | <i>RUFY2</i>    | ✓ | ✓ | miR-32-3p                       | ✓ | - | 3 |
| rs1162756  | - | -  | T (-) | 30 (1) | <i>HNRNPH3</i>  | ✓ | ✓ | miR-489-3p                      | ✓ | - | 3 |

Prioritization of the 47 miRNA-binding site SNPs associated with POAG endophenotypes. A functional score (between 1 and 10) was calculated for each SNP by combining the results of our predefined criteria including the strength of association, LD pattern, eQTL data, expression and importance of the related miRNA and target gene in the eye.

1. The strength of the association in GWAS results: Lead SNP ✓✓(2), One of the top 10% SNPs in the locus ✓(1), Only passed the threshold (0).
2. The eQTL data: Correlation between SNP and expression of the host gene ✓✓(2), Correlation of SNPs with expression of the nearby genes in the locus ✓(1), No correlation (0).
3. The LD pattern: No or just a few synonymous proxies (2), Several synonymous proxies, but no non-synonymous (1), Several proxies including non-synonymous proxy SNPs (0).
4. Host gene: Expressed in the eye and previously reported to be involved in POAG ✓✓(2), Expressed in the eye or involved in POAG ✓(1), Not expressed in the eye and no evidence to be involved in POAG (0).
5. miRNA: Expressed in the eye and previously reported to be involved in the eye disease ✓✓(2), Expressed in the eye or involved in the eye disease ✓(1), Not expressed in the eye and no evidence to be involved in the eye disease (0). One extra point for the miRNA-target interactions that are validated.

**Figure S1. The predicted hairpin structure of pre-miR-612 and pre-miR-4707 and the position of two identified variants associated with VCDR and cup area**

**pre-miR-612**

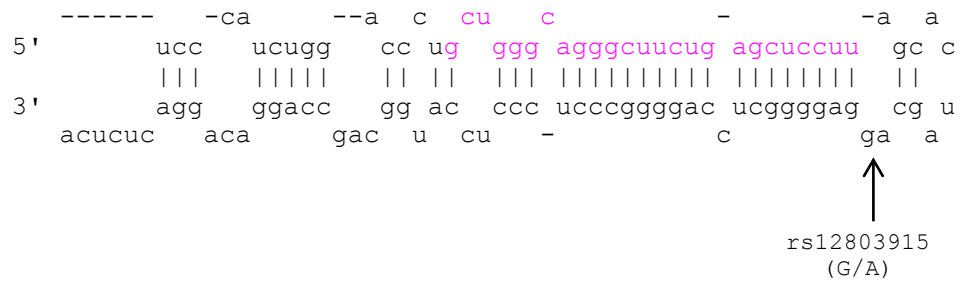

**pre-miR-4707**

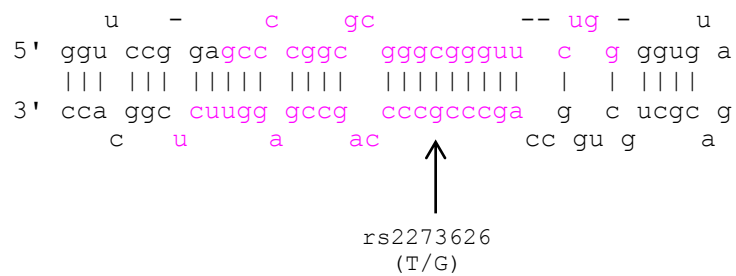

**Figure S2. Manhattan plots showing the association of 72,052 miRNA-binding site variants with POAG endophenotypes**

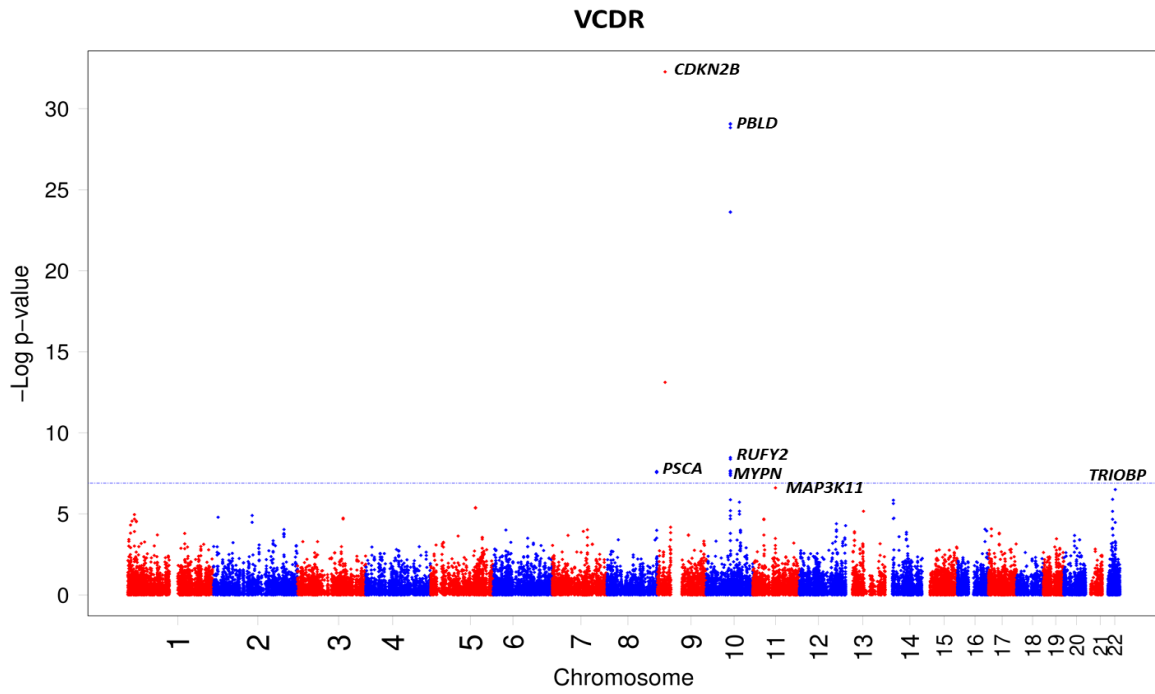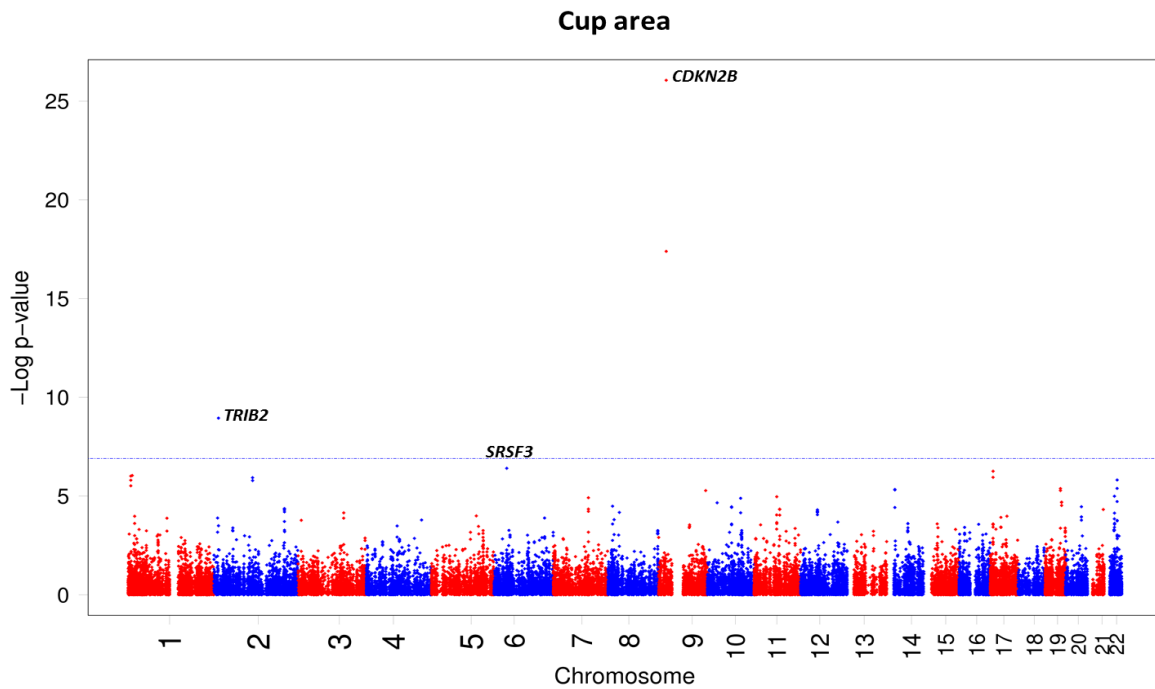

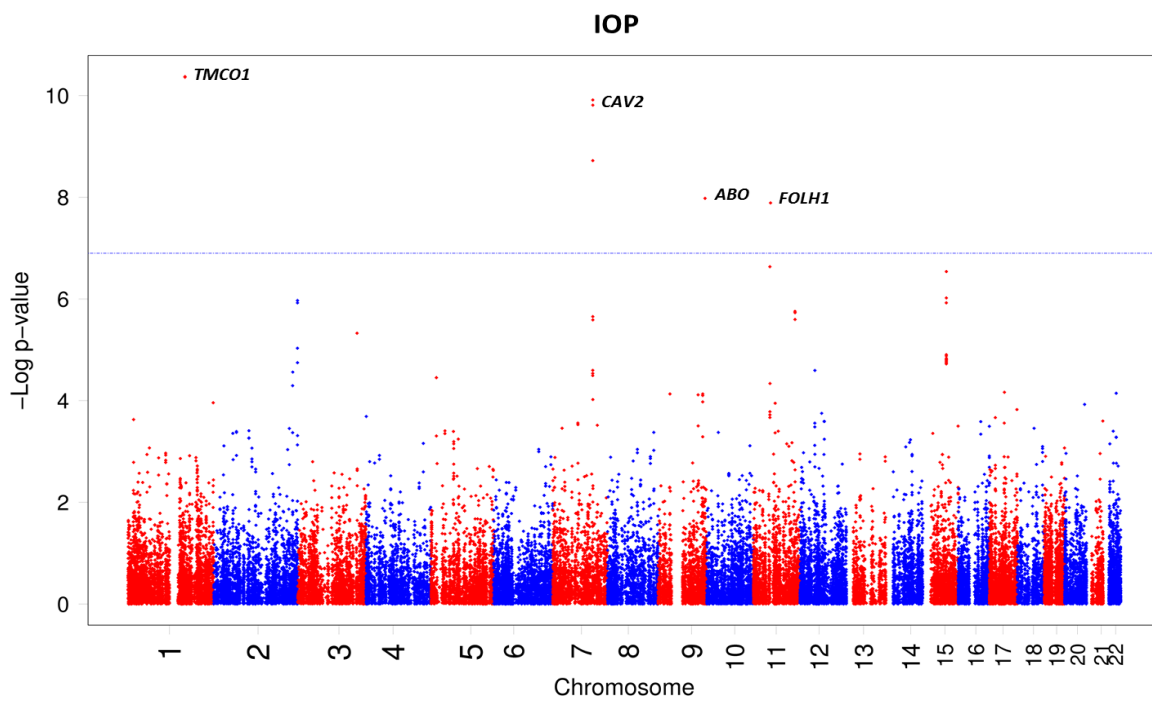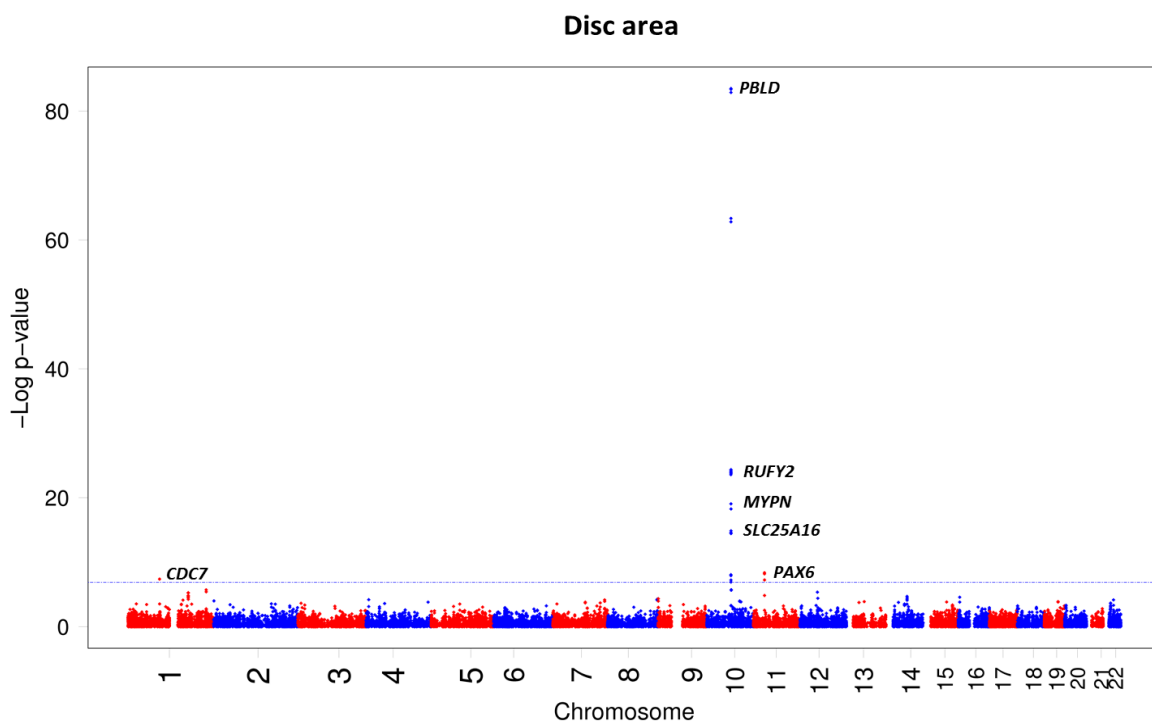

**Figure S3. Regional plots showing the association of ten highlighted miRNA-binding site variants with POAG endophenotypes**

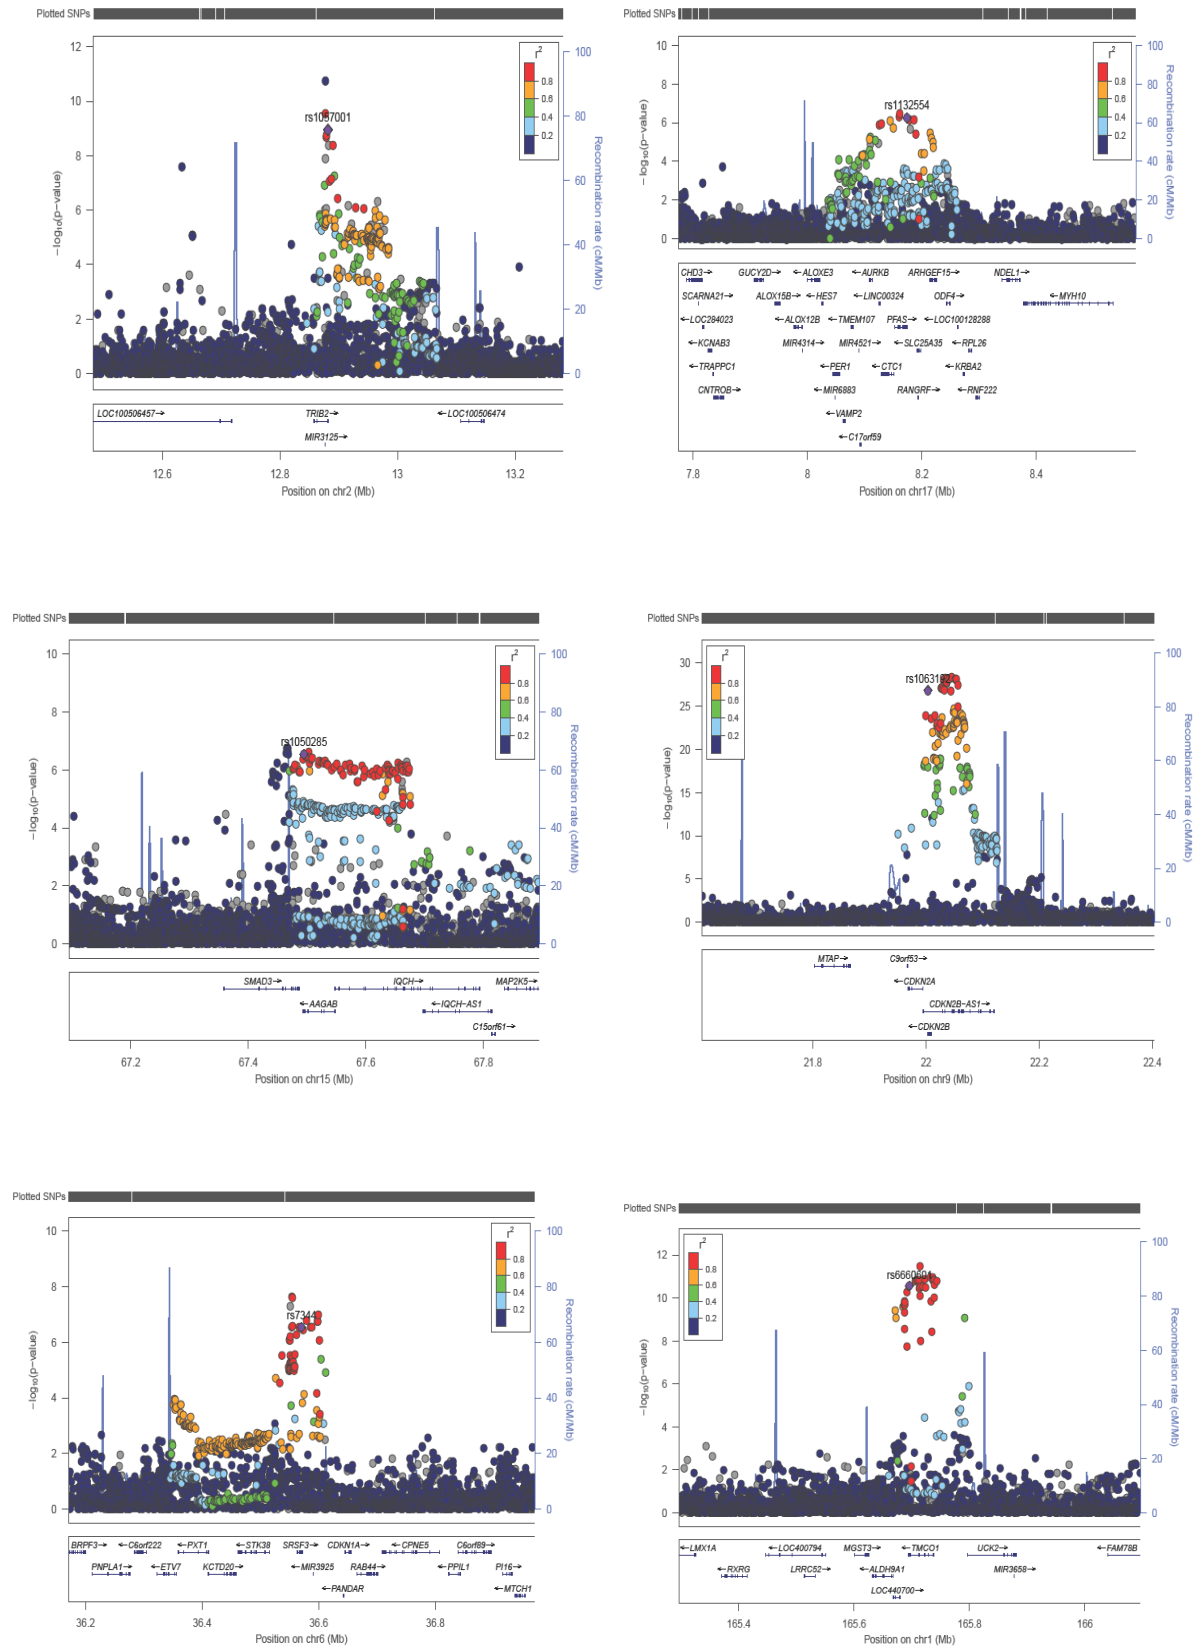

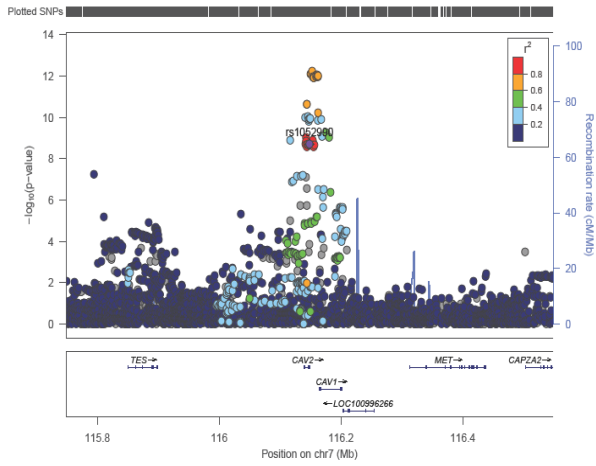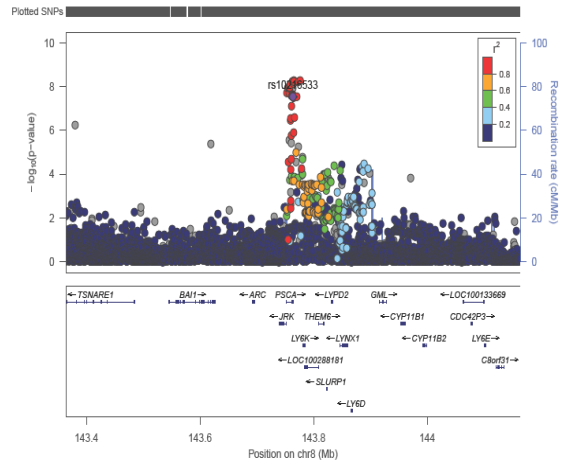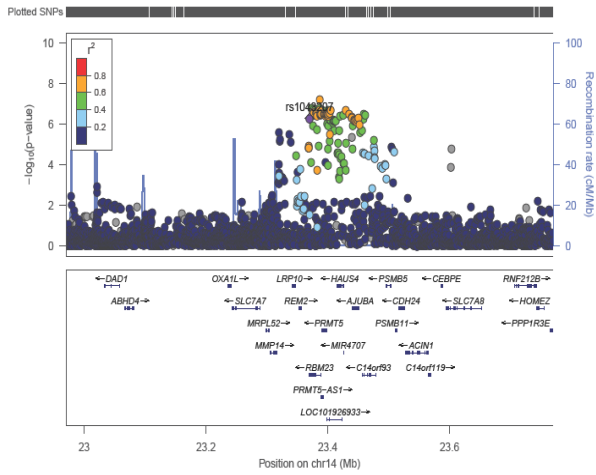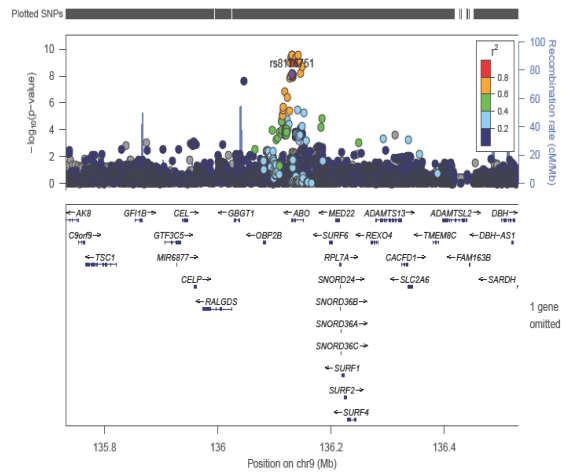

Supplement: IOVS-17-22410-s01.pdf [file IOVS-17-22410-s01.pdf]
